# Supplementary material for: The Effects of Mindfulness-Based Interventions on Telomere Length and Telomerase Activity: A Systematic Review and Meta-Analysis
Source: Springer Nature journal article supplement (doi:10.1007/s12671-023-02075-x), 2023-01-25
Supplement: MOESM1 [file 23955336]

## Supplemental Materials

**Figure S1**  
PRISMA Flow Chart

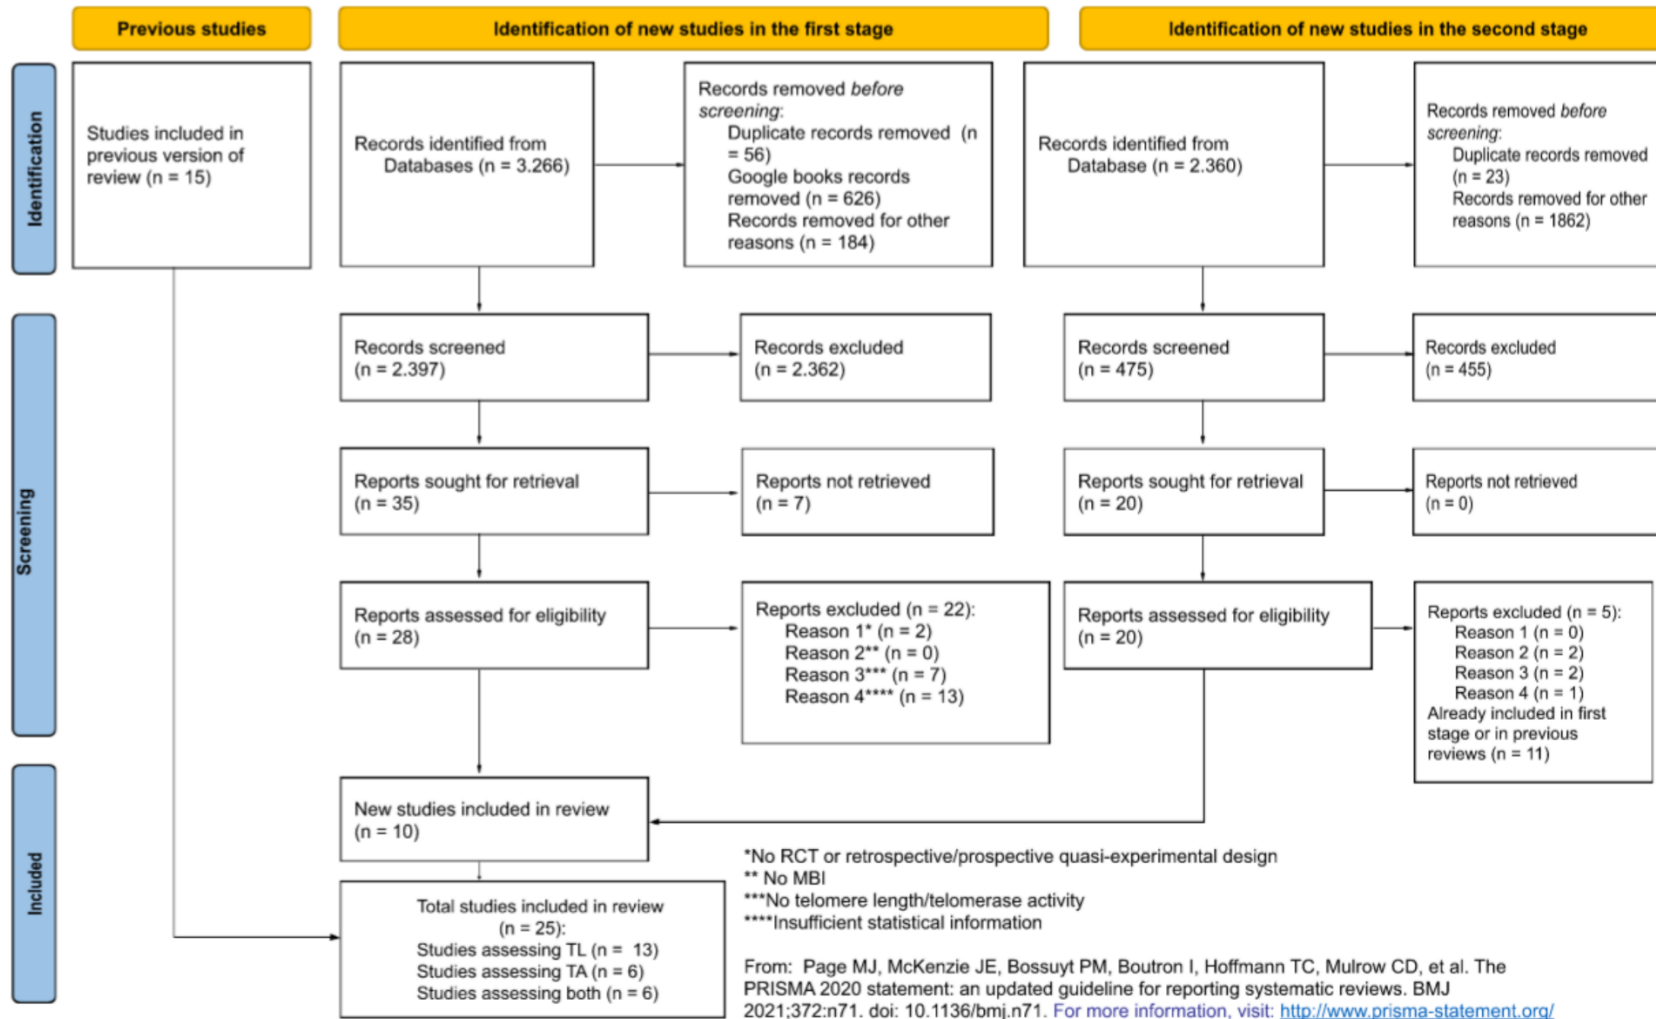

**Figure S2**  
*Forest Plot for Telomere Length*

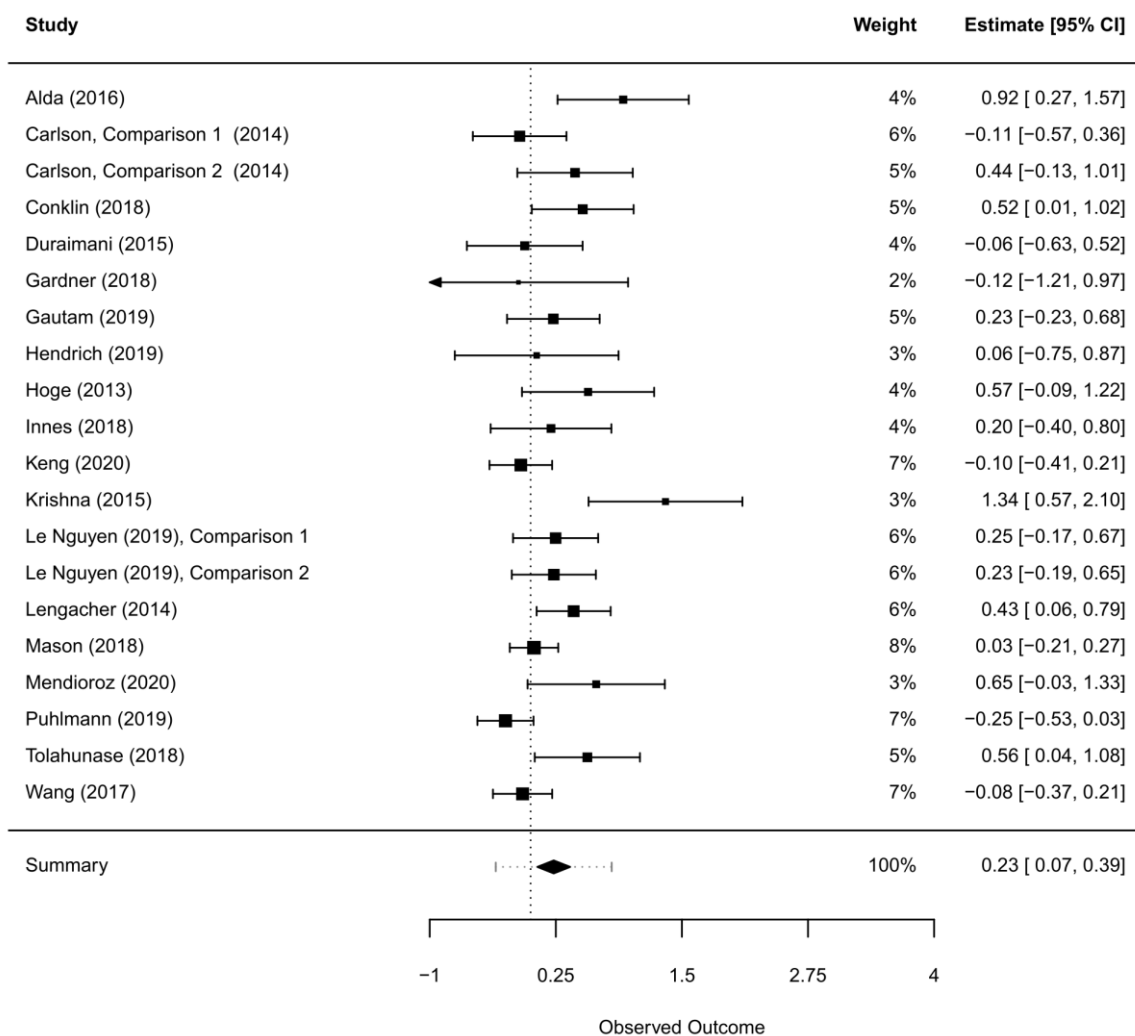

**Figure S3**  
*Forest Plot for Telomerase Activity*

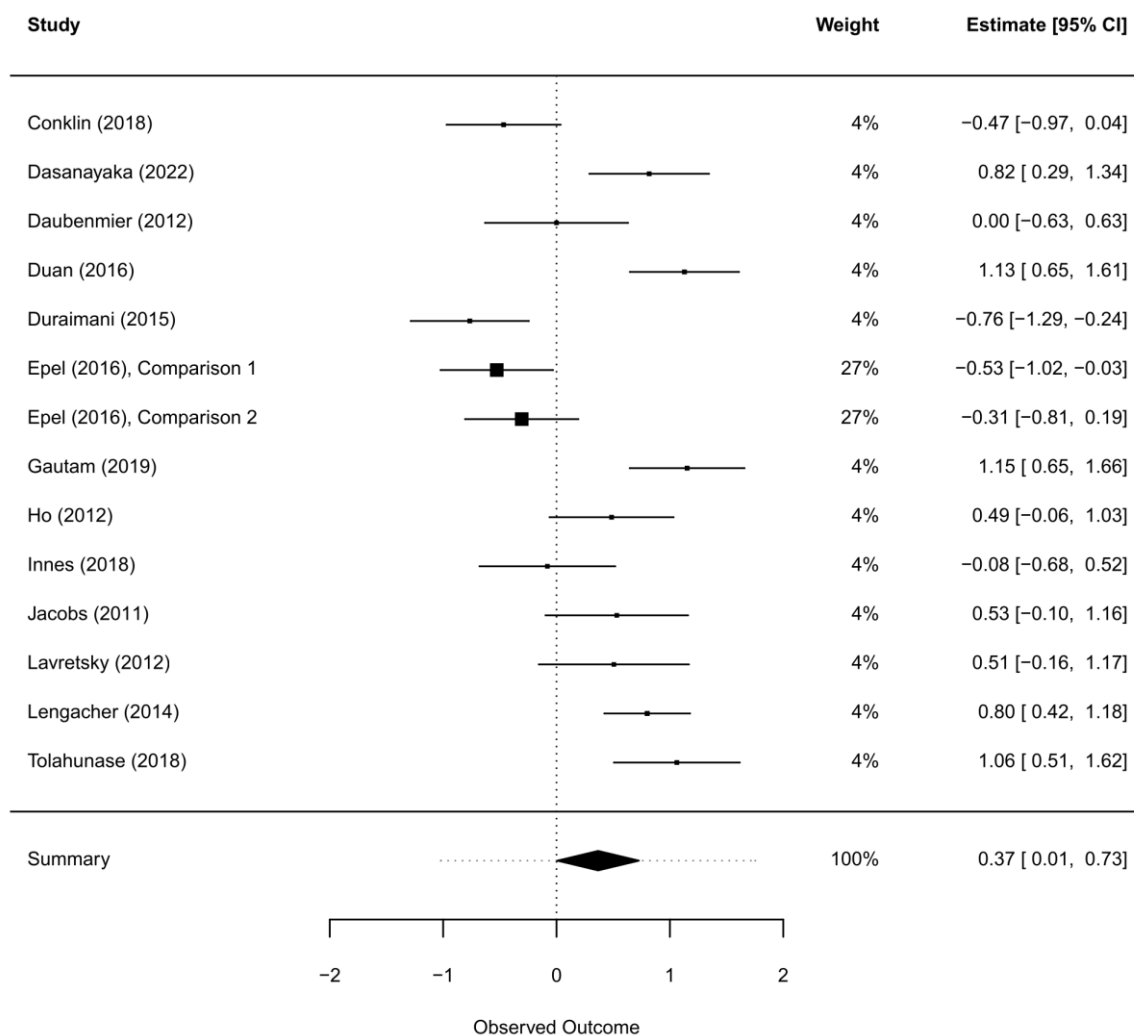

**Figure S4**

*Risk of Bias of Individual RCTs According to Cochrane Risk of Bias Tool (McGuinness & Higgins, 2020)*

|       |                          | Risk of bias |    |    |    |    |    |         |
|-------|--------------------------|--------------|----|----|----|----|----|---------|
|       |                          | D1           | D2 | D3 | D4 | D5 | D6 | Overall |
| Study | Carlson et al. (2014)    |              |    |    |    |    |    |         |
|       | Daubenmier et al. (2012) |              |    |    |    |    |    |         |
|       | Duan et al. (2016)       |              |    |    |    |    |    |         |
|       | Duraimani et al. (2015)  |              |    |    |    |    |    |         |
|       | Epel et al. (2016)       |              |    |    |    |    |    |         |
|       | Gardner (2018)           |              |    |    |    |    |    |         |
|       | Gautam et al. (2019)     |              |    |    |    |    |    |         |
|       | Hendrich (2019)          |              |    |    |    |    |    |         |
|       | Ho et al. (2012)         |              |    |    |    |    |    |         |
|       | Innes et al. (2018)      |              |    |    |    |    |    |         |
|       | Jacobs et al. (2011)     |              |    |    |    |    |    |         |
|       | Keng et al. (2020)       |              |    |    |    |    |    |         |
|       | Lavretsky et al. (2012)  |              |    |    |    |    |    |         |
|       | Lengacher et al. (2014)  |              |    |    |    |    |    |         |
|       | Le Nguyen et al. (2019)  |              |    |    |    |    |    |         |
|       | Mason et al. (2018)      |              |    |    |    |    |    |         |
|       | Puhlmann et al. (2019)   |              |    |    |    |    |    |         |
|       | Tolahunase et al. (2018) |              |    |    |    |    |    |         |
|       | Wang et al. (2017)       |              |    |    |    |    |    |         |

D1: Sequence Selection  
D2: Allocation Concealment  
D3: Blinding Personnel  
D4: Blinding Assessors  
D5: Incomplete Data  
D6: Selective Reporting

Judgement  
 High  
 Unclear  
 Low

*Note.* Ratings of Carlson et al. (2014), Daubenmier et al. (2012), Epel et al. (2016), Gautam et al. (2019), Ho et al. (2012), Innes et al. (2018), Keng et al. (2020), Lavretsky et al. (2012),

Lengacher et al. (2014), Tolahunase et al. (2018), and Weng et al. (2017) were taken from Dunn and Dimolareva (2022); ratings of Le Nguyen et al. (2019) and Puhlmann et al. (2019) were taken from Dasanayaka et al. (2021).

**Figure S5**

*Summary Risk of Bias for RCTs According to Cochrane Risk of Bias Tool (McGuinness & Higgins, 2020)*

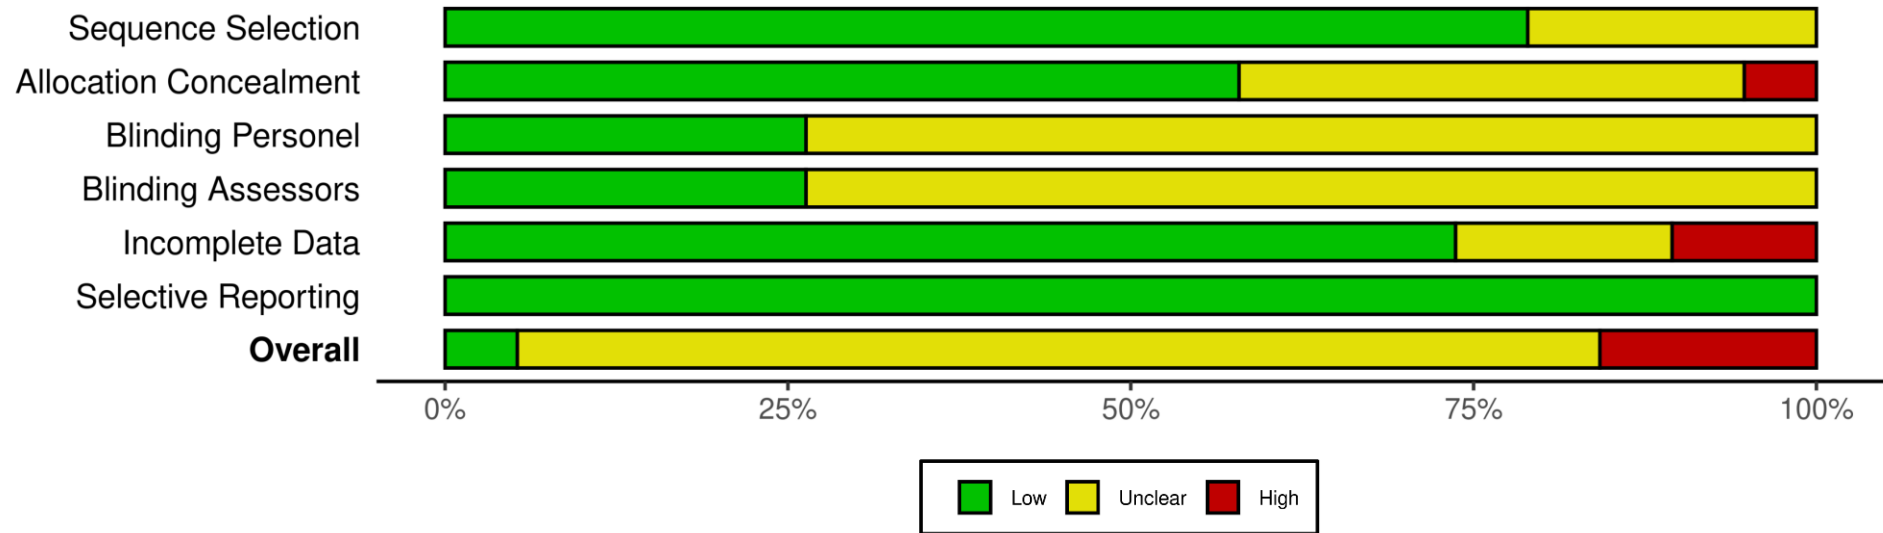

**Figure S6**

*Risk of Bias for the Quasi-Experimental Design of Conklin et al. (2018) with robvis (McGuinness & Higgins, 2020)*

|       |                       | Risk of bias                                                                                                                                                                                                                              |    |    |    |    |    |    |    |    |                             |  |
|-------|-----------------------|-------------------------------------------------------------------------------------------------------------------------------------------------------------------------------------------------------------------------------------------|----|----|----|----|----|----|----|----|-----------------------------|--|
|       |                       | D1                                                                                                                                                                                                                                        | D2 | D3 | D4 | D5 | D6 | D7 | D8 | D9 | Overall                     |  |
| Study | Conklin et al. (2018) |                                                                                                                                                                                                                                           |    |    |    |    |    |    |    |    |                             |  |
|       |                       | D1: Causality<br>D2: Sample Representativeness<br>D3: Compare Group Treatment<br>D4: Control Group<br>D5: Outcome Assessment<br>D6: Follow Up<br>D7: Outcome Inclusion<br>D8: Outcome Measurement Reliability<br>D9: Statistical Analysis |    |    |    |    |    |    |    |    | Judgement<br>Unclear<br>Low |  |

**Figure S7***Risk of Bias for Case-Control Studies with robvis (McGuinness & Higgins, 2020)*

|       |                         | Risk of bias |    |    |    |    |    |    |    |    |         |
|-------|-------------------------|--------------|----|----|----|----|----|----|----|----|---------|
|       |                         | D1           | D2 | D3 | D4 | D5 | D6 | D7 | D8 | D9 | Overall |
| Study | Alda et al. (2016)      | +            | +  | +  | +  | +  | +  | +  | +  | +  | +       |
|       | Hoge et al. (2013)      | +            | +  | +  | +  | +  | +  | +  | +  | +  | +       |
|       | Krishna et al. (2015)   | -            | +  | -  | -  | -  | X  | X  | +  | -  | X       |
|       | Mendioroz et al. (2020) | +            | -  | +  | +  | +  | +  | +  | +  | +  | -       |

D1: Comparability  
 D2: Case Control Matching  
 D3: Case Control Identification Criterita  
 D4: Exposure Measurement Quality  
 D5: Exposure Measurement Equality  
 D6: Confounding Identification  
 D7: Confounding Strategies  
 D8: Outcome Measurement Quality  
 D9: Statistical Analysis

Judgement  
 X High  
 - Unclear  
 + Low



**Figure S8**

*Summary Risk of Bias for Case-Control Studies with robvis (McGuinness & Higgins, 2020)*

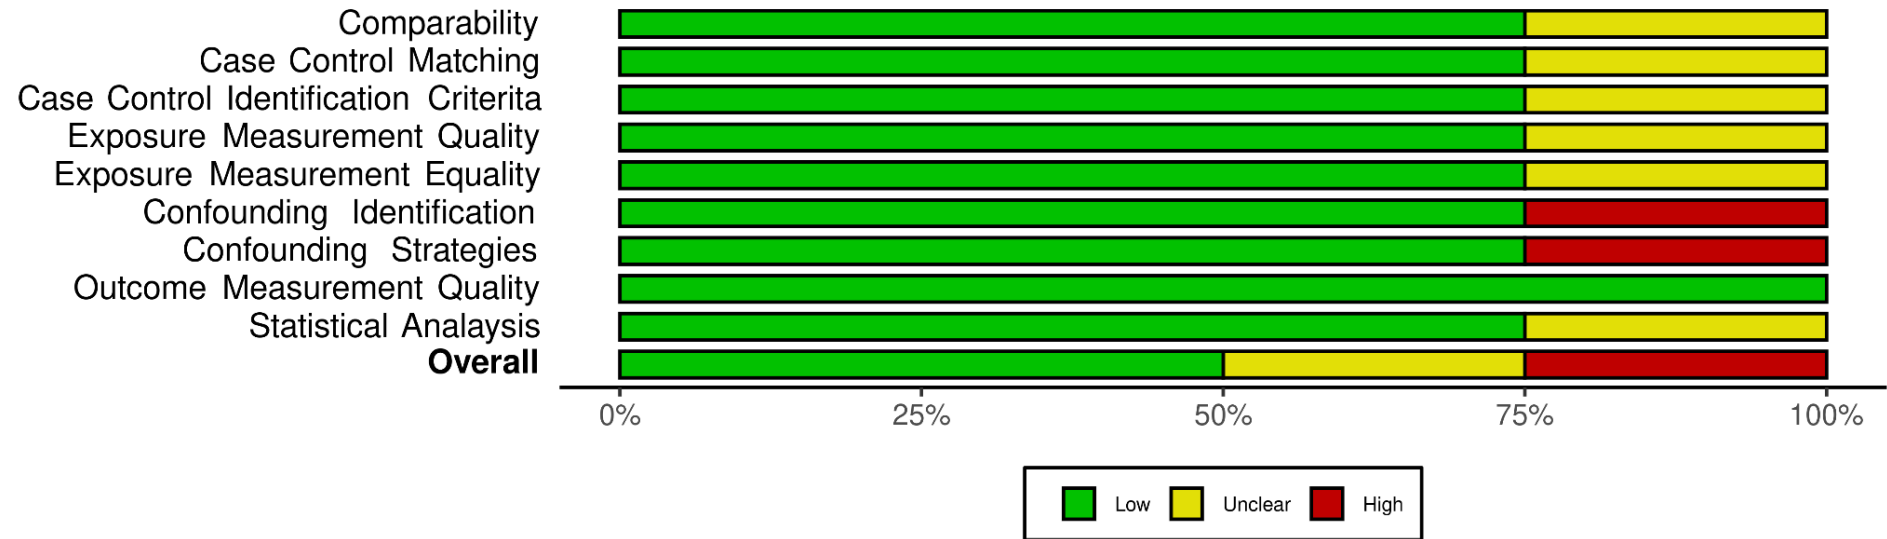

**Figure S9**

*Relative Variable Importance (Left: Telomere Length, Right: Telomerase Activity)*

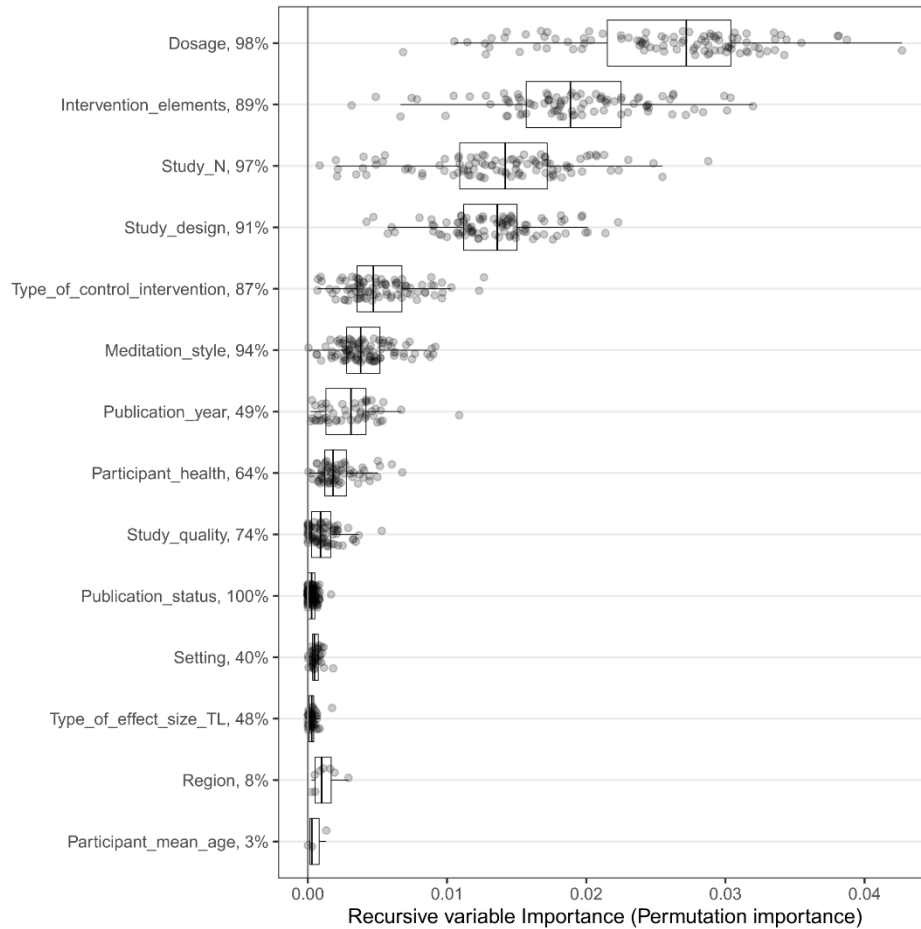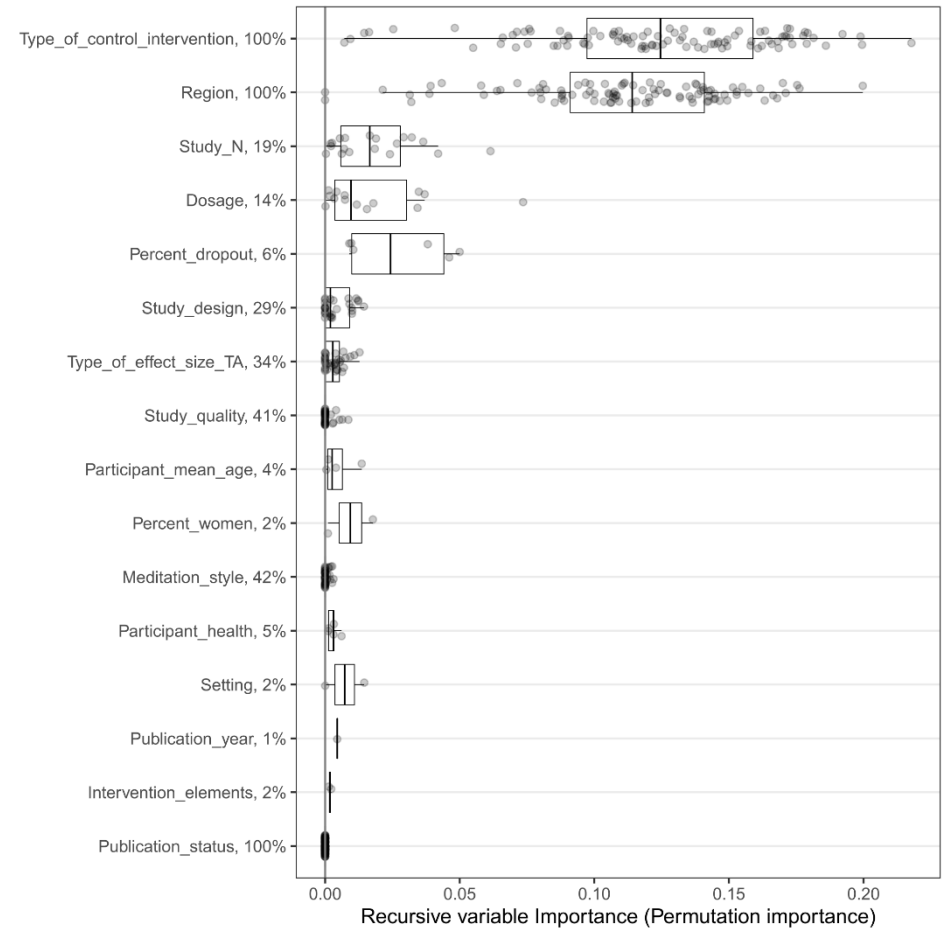

### Studies Included in the Meta-Analysis

- Alda, M., Puebla-Guedea, M., Rodero, B., Demarzo, M., Montero-Marin, J., Roca, M., & Garcia-Campayo, J. (2016). Zen meditation, length of telomeres, and the role of experiential avoidance and compassion. *Mindfulness*, 7, 651-659. <https://doi.org/10.1007/s12671-016-0500-5>
- Carlson, L. E., Beattie, T. L., Giese-Davis, J., Faris, P., Tamagawa, R., Fick, L. J., Degelman, E. S., & Speca, M. (2015). Mindfulness-based cancer recovery and supportive-expressive therapy maintain telomere length relative to controls in distressed breast cancer survivors. *Cancer*, 121(3), 476-484. <https://doi.org/10.1002/cncr.29063>
- Conklin, Q. A., King, B. G., Zanesco, A. P., Lin, J., Hamidi, A. B., Pokorny, J. J., Álvarez-López, M. J., Cosín-Thomás, M., Huang, C., Kaliman, P., Epel, E. S., & Saron, C. D. (2018). Insight meditation and telomere biology: The effects of intensive retreat and the moderating role of personality. *Brain, Behavior, and Immunity*, 70, 233-245. <https://doi.org/10.1016/j.bbi.2018.03.003>
- Dasanayaka, N. N., Sirisena, N. D., & Samaranyake, N. (2022). Impact of meditation-based lifestyle practices on mindfulness, wellbeing, and plasma telomerase levels: A case-control study. *Frontiers in Psychology*, 13, Article 846085. <https://doi.org/10.3389/fpsyg.2022.846085>
- Daubenmier, J., Lun, J., Blackburn, E., Hecht, F. M., Kristeller, J., Maninger, N., Kuwata, M., Bacchetti, P., Havel, P. J., & Epel, E. (2012). Changes in stress, eating, and metabolic factors are related to changes in telomerase activity in a randomized mindfulness intervention pilot study. *Psychoneuroendocrinology*, 37(7), 917-928. <https://doi.org/10.1016/j.psyneuen.2011.10.008>
- Duan, G.-X., Wang, K., Su, Y.-H., Tang, S.-Y., Jia, H.-L., Chen, X.-M., & Xie, H.-H. (2016). Effects of Tai Chi on telomerase activity and gerotranscendence in middle aged and elderly adults in Chinese society. *International Journal of Nursing Sciences* 3(3), 235-241. <https://doi.org/10.1016/j.ijnss.2016.07.005>
- Duraimani, S., Schneider, R. H., Randall, O. S., Nidich, S. I., Xu, S., Ketete, M., Rainforth, M. A., Gaylord-King, C., Salerno, J. W., & Fagan, J. (2015). Effects of lifestyle modification on telomerase gene expression in hypertensive patients: A pilot trial of stress reduction and health education programs in African Americans. *PLoS ONE*, 10(11), Article e0142689. <https://doi.org/10.1371/journal.pone.0142689>
- Epel, E. S., Puterman, E., Lin, J., Blackburn, E. H., Lum, P. Y., Beckmann, N. D., Zhu, J., Lee, E., Gilbert, A., Rissman, R. A., Tanzi, R. E., & Schadt, E. E. (2016). Meditation and vacation effects have an impact on disease-associated molecular phenotypes. *Translational Psychiatry*, 6, Article e880. <https://doi.org/10.1038/tp.2016.164>
- Gardener, C. M. (2018). *Exploring the effects of acceptance and commitment therapy (ACT) on biomarkers of stress in breast cancer survivors* [Bachelor of Science thesis, University of Southern Queensland]. USQ ePrints. <http://eprints.usq.edu.au/id/eprint/35883>
- Gautam, S., Tolahunase, M., Kumar, U., & Dada, R. (2019). Impact of yoga based mind-body intervention on systemic inflammatory markers and co-morbid depression in active rheumatoid arthritis patients: A randomized controlled trial. *Restorative Neurology and Neuroscience*, 37(1), 41-59. <https://doi.org/10.3233/RNN-180875>

- Hendrich, S. G. (2019). *Effects of a mindfulness-based intervention on depressive symptoms, stress eating, and telomere length in adolescents at-risk for adult obesity* (Publication No. 13897114) [Master of Science thesis, Colorado State University]. ProQuest LLC.
- Ho, R. T. H., Chan, J. S. M., Wang, C.-W., Lau, B. W. M., So, K. F., Yuen, L. P., Sham, J. S. T., & Chan, C. L. W. (2012). A randomized controlled trial of qigong exercise on fatigue symptoms, functioning, and telomerase activity in persons with chronic fatigue or chronic fatigue syndrome. *Annals of Behavioral Medicine, 44*(2), 160-170. <https://doi.org/10.1007/s12160-012-9381-6>
- Hoge, E. A., Chen, M. M., Orr, E., Metcalf, A., Fischer, L. E., Pollack, M. H., DeVivo, I., & Simon, N. M. (2013). Loving-kindness meditation practice associated with longer telomerases in women. *Brain, Behavior, and Immunity, 32*, 159-163. <https://doi.org/10.1016/j.bbi.2013.04.005>
- Innes, K. E., Selfe, T. K., Brundage, K., Montgomery, C., Wen, S., Kandati, S., Bowles, H., Khalsa, D. & Huysmans, Z. (2018). Effects of meditation and music-listening on blood biomarkers of cellular aging and Alzheimer's disease in adults with subjective cognitive decline: An exploratory randomized clinical trial. *Journal of Alzheimer's Disease, 66*(3), 947-970. <https://doi.org/10.3233/JAD-180164>
- Jacobs, T. L., Epel, E. S., Lin, J., Blackburn, E. H., Wolkowitz, O. M., Bridwell, D. A., Zanesco, A. P., Aichele, S. R., Sahdra, B. K., MacLean, K. A., King, B. G., Shaver, P. R., Rosenberg, E. L., Ferrer, E., Wallace, A. B., & Saron, C. D. (2011). Intensive meditation training, immune cell telomerase activity, and psychological mediators. *Psychoneuroendocrinology, 36*, 664-681. <https://doi.org/10.1016/j.psyneuen.2010.09.010>
- Keng, S.-L., Looi, P. L., Tan, E. L. Y., Yim, O.-S., Lai, P. S., Chew, S. H., & Ebstein, R. P. (2020). Effects of mindfulness-based stress reduction on psychological symptoms and telomere length: A randomized active-controlled trial. *Behavior Therapy, 51*(6), 984-996. <https://doi.org/10.1016/j.beth.2020.01.005>
- Krishna, B. H., Keerthi, G. S., Kumar, C. K., & Reddy, N. M. (2015). Association of leukocyte telomere length with oxidative stress in yoga practitioners. *Journal of Clinical and Diagnostic Research, 9*(3), CC01-CC03. <https://doi.org/10.7860/JCDR/2015/13076.5729>
- Lavretsky, H., Siddarth, P., Nazarian, N., Cyr, N. St., Khalsa, D. S., Lin, J., Blackburn, E., Epel, E. S., & Irwin, M. R. (2013). A pilot study of yogic meditation for family dementia caregivers with depressive symptoms: Effects on mental health, cognition, and telomerase activity. *International Journal of Geriatric Psychiatry, 28*(1), 57-65. <https://doi.org/10.1002/gps.3790>
- Le Nguyen, K. D., Lin, J., Algoe, S. B., Brantley, M. M., Kim, S. L., Brantley, J., Salzberg, S., & Fredrickson, B. L. (2019). Loving-kindness meditation slows biological aging in novices: Evidence from a 12-week randomized controlled trial. *Psychoneuroendocrinology, 108*, 20-27. <https://doi.org/10.1016/j.psyneuen.2019.05.020>
- Lengacher, C. A., Reich, R. R., Kip, K. E., Barta, M., Ramesar, S., Paterson, C. L., Moscoso, M. S., Carranza, I., Budhrani, P. H., Kim, S. J., Park, H. Y., Jacobsen, P. B., Schell, M. J., Jim H. S. L., Post-White, J., Farias, J. R., & Park, J. Y. (2014). Influence of mindfulness-based stress reduction (MBSR) on telomerase activity in woman with

- breast cancer (BC). *Biological Research for Nursing*, 16(4), 438-447.  
<https://doi.org/10.1177/1099800413519495>
- Mason, A. E., Hecht, F. M., Daubenmier, J. J., Sbarra, D. A., Lin, J., Moran, P. J., Schleicher, S. G., Acree, M., Prather, A. A., & Epel, E. S. (2018). Weight loss, weight-loss maintenance, and cellular aging in the supporting health through nutrition and exercise (SHINE) study. *Psychosomatic Medicine*, 80(7), 609-619.  
<https://doi.org/10.1097/PSY.0000000000000616>
- Mendioroz, M., Puebla-Guedea, M. P., Montero-Marín, J., Urdániz-Casado, A., Blanco-Luquin, I., Roldán, M., Labarga, A., & García-Campayo, J. (2020). Telomere length correlates with subtelomeric DNA methylation in long-term mindfulness practitioners. *Scientific Reports*, 10, Article 4564. <https://doi.org/10.1038/s41598-020-61241-6>
- Puhlmann, L. M. C., Valk, S. L., Engert, V., Bernhardt, B. C., Lin, J., Epel, E. S., Vrtička, P., & Singer, T. (2019). Association of short-term change in leukocyte telomere length with cortical thickness and outcomes of mental training among healthy adults. A randomized clinical trial. *JAMA Network Open*, 2(9), Article e199687.  
<https://doi.org/10.1001/jamanetworkopen.2019.9687>
- Tolahunase, M. R., Sagar, R., Faiq, M., & Dada, R. (2018). Yoga- and meditation-based lifestyle intervention increases neuroplasticity and reduces severity of major depressive disorder: A randomized controlled trial. *Restorative Neurology and Neuroscience*, 36(3), 423-442. <https://doi.org/10.3233/RNN-170810>
- Wang, X., Sundquist, K., Hedelius, A., Palmér, K., Memon, A. A., & Sundquist, J. (2017). Leukocyte telomere length and depression, anxiety and stress and adjustment disorders in primary health care patients. *BMC Psychiatry*, 17, Article 148.  
<https://doi.org/10.1186/s12888-017-1308-0>
